# Supplementary material for: Risk factors and survival of colorectal cancer patients with RAS/BRAF gene mutations
Source: Research Square preprint supplement (doi:10.21203/rs.3.rs-7657018/v1), 2025-10-08
Supplement: Supplementary file 1 [file b6379415c62b97ecf43afcbf.docx]

Journal of Gastrointestinal Cancer

Risk factors and survival of colorectal cancer patients with RAS/*BRAF* gene mutations.

Ekterina A. Kazachenko MD 1,2, Vitaliy P. Shubin PhD 1, Evgeniy A. Khomyakov PhD 1,3, Alexey S. Tsukanov A.S. PhD 1, Stanislav S. Otstanov PhD 4,5, professor Evgeniy G. Rybakov PhD 1, professor Yuriy A. Shelygin PhD 1,3

1 – Ryzhikh National Medical Research Center of Coloproctology, Salyama Adilya st., 2, Moscow, 123423, Russia.

2 – Center for additional, additional professional and online education "PUSK", Moscow Institute of Physics and Technology (MIPT, PhysTech), 9 Institutskiy lane, Dolgoprudny, Moscow, 141700, Russian Federation

3 - Russian Medical Academy of Continuous Professional Education, Barrikadnaya st., 2/1, Moscow, 125993, Russia)

4 – Department of Medical and Technical Management, Bauman Moscow State Technical University, 2nd Baumanskaya St., 5, building 1, Moscow, 105005, Russia

5 - Laboratory of Public Health Indicators Analysis and Health Digitalization of Moscow Institute of Physics and Technology (MIPT, PhysTech), 9 Institutskiy lane, Dolgoprudny, Moscow, 141700, Russia

*Author information:*

Ekterina A. Kazachenko – II year student of the Master's degree in “Applied Data Analysis in the medical field”, center for additional, additional professional and online education "PUSK", Moscow Institute of Physics and Technology (MIPT, PhysTech), MD, specialist of the Department of planning and organization of scientific research at the Ryzhikh National Medical Research Center of Coloproctology, Moscow, Russia. ORCID: 0000-0001-6322-7016 E-mail: [ekaterina.k.97@mail.ru](mailto:ekaterina.k.97@mail.ru)

Vitaliy P. Shubin – PhD, Senior Researcher at the Ryzhikh National Medical Research Center of Coloproctology, Moscow, Russia. ORCID: 0000-0002-3820-7651, E-mail: [shwit@mail.ru](mailto:shwit@mail.ru)

Evgeniy A. Khomyakov – PhD, Researcher at the Ryzhikh National Medical Research Center of Coloproctology, Assistant of the Department of Coloproctology of the Russian Medical Academy of Continuous Professional Education, Moscow, Russia. ORCID: 0000-0002-3399-0608, E-mail: [evgeniy.khomyakov@gmail.com](mailto:evgeniy.khomyakov@gmail.com)

Alexey S. Tsukanov – PhD, Chief Researcher of the Department of Laboratory Genetics of the Ryzhikh National Medical Research Center of Coloproctology, Moscow, Russia. ORCID: 0000-0001-8571-7462, E-mail: [Tsukanov81@rambler.ru](mailto:Tsukanov81@rambler.ru)

Stanislav S. Otstanov - PhD in Economics, Head of the Department of Medical and Technical Management, Bauman Moscow State Technical University, Moscow, Russia; Head of the Laboratory of Public Health Indicators Analysis and Health Digitalization, Moscow Institute of Physics and Technology, Dolgoprudny, Russia. ORCID: 0000-0003-2043-495X, E-mail: [otstavnov.ss@mipt.ru](mailto:otstavnov.ss@mipt.ru)

Evgeniy G. Rybakov – PhD, professor of the Russian Academy of Sciences, Head of the Oncoproctology Department of the Ryzhikh National Medical Research Center of Coloproctology, Moscow, Russia. ORCID 0000-0002-3919-9067, E-mail: [erybakov@gmail.com](mailto:erybakov@gmail.com)

Yuriy A. Shelygin - PhD, professor, Academician of the Russian Academy of Sciences, President of the All-Russian Public Organization "Association of Coloproctologists of Russia", Scientific Director of the Ryzhikh National Medical Research Center of Coloproctology, Head of the Department of Coloproctology of the Russian Medical Academy of Continuous Professional Education, Moscow, Russia. Moscow, Russia. ORCID: 0000-0002-8480-9362, E-mail: [shelygin@yandex.ru](mailto:shelygin@yandex.ru)

*Address for correspondence*: Ekaterina A. Kazachenko, II year student of the Master's degree in “Applied Data Analysis in the medical field”, center for additional, additional professional and online education "PUSK", Moscow Institute of Physics and Technology (MIPT, PhysTech), MD, specialist of the Department of planning and organization of scientific research at the Ryzhikh National Medical Research Center of Coloproctology, Salyama Adilya st., 2, Moscow, 123423, Russia; e-mail: [ekaterina.k.97@mail.ru](mailto:ekaterina.k.97@mail.ru), phone number +7 (926) 972-19-22

Table 4. Frequency of RAS/*BRAF* genes mutations.

| Localization | Frequency (%) |
| --- | --- |
| ***KRAS,* exon 2**  p.Gly12Asp  p.Gly13Asp  p.Gly12Val  p.Gly12Ser  p.Gly12Cys  p.Gly12Ala  p.Gly13Cys  p.Gly12Phe  p.Gly12Arg  p.Val14Ile | **271 (87.4%)**  109 (40.2%)  55 (20.3%)  49 (18.1%)  16 (5.9%)  14 (5.2%)  14 (5,2%)  6 (2.2%)  4 (1.5%)  3 (1.1%)  1 (0.4%) |
| ***KRAS,* exon 3**  p.Gln61His  p.Gln61Leu  p.Gln61Arg  p.Ala59Thr  p.Ala66delinsGluGluTyrSerGlu  p.Gln61Pro  p.Leu56_Ala66dup | **17 (5.5%)**  8 (47.1%)  2 (11.8%)  2 (11.8%)  2 (11.8%)  1 (5.9%)  1 (5.9%)  1 (5.9%) |
| ***KRAS,* exon4**  p.Ala146Thr  p.Lys117Asn  p.Ala146Pro  p.Ala146Val | **23 (7.4%)**  14 (60.9%)  5 (21.7%)  2 (8.7%)  2 (8.7%) |
| ***NRAS,* exon 2**  p.Gly12Asp  p.Gly13Arg  p.Gly13Tyr  p.Gly12Val  p.Gly12Cys | **15 (45.5%)**  8 (53.3%)  4 (26.7%)  1 (6.7%)  1 (6.7%)  1 (6.7%) |
| ***NRAS,* exon3**  p.Gln61Lys  p.Gln61Arg  p.Gln61Leu  p.Gln61His | **18 (54.5%)**  11 (61.1%)  5 (27.8%)  1 (5.6%)  1 (5.6%) |
| ***BRAF***  p.Val600Glu  p.Lys601Glu | 50 (96.2%)  2 (3.8%) |
